# Supplementary material for: Two-year recall for people with no diabetic retinopathy: a multi-ethnic population-based retrospective cohort study using real-world data to quantify the effect
Source: PubMed Central journal article supplement (PMC10715554; doi:10.1136/bjo-2023-324097), 2023-10-24
Supplement: bjo-2023-324097supp001.pdf [file bjo-2023-324097supp001.pdf]

**Supplemental Table 2: Cumulative incidence rates of STDR per 100-person-years among PLD without diabetic retinopathy on 2 consecutive screening appointments, overall and by age groups, sex, ethnic group and IMD N= 82,782**

| Characteristic                       | Year 1             | Year 2             | Year 3             | Year 4             | Year 5             | Year 9             |
|--------------------------------------|--------------------|--------------------|--------------------|--------------------|--------------------|--------------------|
| <b>Overall</b>                       | 0.20 (0.17 - 0.22) | 0.33 (0.30 - 0.36) | 0.40 (0.36 - 0.43) | 0.44 (0.40 - 0.48) | 0.45 (0.41 - 0.49) | 0.51 (0.47 - 0.55) |
| <b>Age groups</b>                    |                    |                    |                    |                    |                    |                    |
| Less than 45 years                   | 0.19 (0.13 - 0.25) | 0.35 (0.28 - 0.43) | 0.44 (0.35 - 0.52) | 0.48 (0.39 - 0.57) | 0.52 (0.42 - 0.61) | 0.67 (0.56 - 0.77) |
| 45 to <55 years                      | 0.18 (0.13 - 0.23) | 0.31 (0.25 - 0.38) | 0.36 (0.29 - 0.43) | 0.41 (0.33 - 0.48) | 0.42 (0.35 - 0.50) | 0.49 (0.41 - 0.57) |
| 55 to <65 years                      | 0.17 (0.13 - 0.22) | 0.27 (0.21 - 0.33) | 0.32 (0.26 - 0.38) | 0.35 (0.28 - 0.42) | 0.35 (0.29 - 0.42) | 0.39 (0.32 - 0.46) |
| 65 years and over                    | 0.24 (0.19 - 0.29) | 0.38 (0.31 - 0.44) | 0.47 (0.40 - 0.54) | 0.51 (0.44 - 0.58) | 0.51 (0.44 - 0.59) | 0.53 (0.45 - 0.60) |
| <b>Sex</b>                           |                    |                    |                    |                    |                    |                    |
| Female                               | 0.22 (0.19 - 0.26) | 0.35 (0.30 - 0.40) | 0.44 (0.38 - 0.49) | 0.48 (0.42 - 0.54) | 0.48 (0.42 - 0.53) | 0.54 (0.48 - 0.60) |
| Male                                 | 0.17 (0.14 - 0.21) | 0.31 (0.27 - 0.35) | 0.36 (0.31 - 0.41) | 0.40 (0.35 - 0.45) | 0.42 (0.37 - 0.47) | 0.48 (0.43 - 0.54) |
| <b>Ethnicity</b>                     |                    |                    |                    |                    |                    |                    |
| White                                | 0.15 (0.12 - 0.19) | 0.22 (0.18 - 0.27) | 0.27 (0.22 - 0.32) | 0.29 (0.24 - 0.35) | 0.30 (0.25 - 0.35) | 0.34 (0.29 - 0.40) |
| South Asian                          | 0.21 (0.17 - 0.26) | 0.37 (0.31 - 0.42) | 0.43 (0.37 - 0.49) | 0.47 (0.41 - 0.54) | 0.48 (0.42 - 0.55) | 0.55 (0.48 - 0.62) |
| Black                                | 0.26 (0.18 - 0.33) | 0.47 (0.37 - 0.57) | 0.59 (0.49 - 0.70) | 0.67 (0.56 - 0.79) | 0.71 (0.59 - 0.83) | 0.77 (0.65 - 0.90) |
| Any other Asian                      | 0.23 (0.12 - 0.35) | 0.29 (0.16 - 0.42) | 0.39 (0.24 - 0.53) | 0.44 (0.28 - 0.60) | 0.43 (0.28 - 0.59) | 0.48 (0.31 - 0.64) |
| Other                                | 0.26 (0.09 - 0.43) | 0.40 (0.18 - 0.61) | 0.41 (0.19 - 0.63) | 0.47 (0.23 - 0.70) | 0.48 (0.25 - 0.72) | 0.63 (0.36 - 0.90) |
| Mixed                                | 0.20 (0.00 - 0.43) | 0.60 (0.20 - 1.00) | 0.69 (0.26 - 1.12) | 0.61 (0.21 - 1.02) | 0.54 (0.16 - 0.93) | 0.67 (0.25 - 1.10) |
| Chinese                              | 0.00 (0.00 - 0.00) | 0.10 (0.00 - 0.31) | 0.21 (0.00 - 0.52) | 0.23 (0.00 - 0.56) | 0.25 (0.00 - 0.60) | 0.21 (0.00 - 0.52) |
| Unknown                              | 0.16 (0.00 - 0.42) | 0.67 (0.14 - 1.19) | 0.59 (0.09 - 1.08) | 0.55 (0.07 - 1.02) | 0.52 (0.06 - 0.99) | 0.50 (0.05 - 0.96) |
| <b>Type of diabetes</b>              |                    |                    |                    |                    |                    |                    |
| Type 2                               | 0.20 (0.17 - 0.22) | 0.32 (0.29 - 0.35) | 0.39 (0.35 - 0.43) | 0.43 (0.39 - 0.47) | 0.44 (0.40 - 0.48) | 0.50 (0.46 - 0.54) |
| Type 1                               | 0.38 (0.16 - 0.60) | 0.53 (0.27 - 0.79) | 0.67 (0.38 - 0.96) | 0.75 (0.44 - 1.05) | 0.77 (0.46 - 1.09) | 0.84 (0.52 - 1.17) |
| Other                                | 0.00 (0.00 - 0.00) | 0.42 (0.00 - 1.33) | 0.96 (0.00 - 2.34) | 0.82 (0.00 - 2.09) | 0.75 (0.00 - 1.96) | 0.86 (0.00 - 2.15) |
| <b>Index of Multiple Deprivation</b> |                    |                    |                    |                    |                    |                    |
| 1                                    | 0.16 (0.09 - 0.23) | 0.25 (0.16 - 0.33) | 0.36 (0.26 - 0.47) | 0.43 (0.31 - 0.54) | 0.45 (0.34 - 0.57) | 0.48 (0.36 - 0.61) |
| 2                                    | 0.22 (0.17 - 0.27) | 0.37 (0.30 - 0.43) | 0.43 (0.36 - 0.49) | 0.47 (0.40 - 0.54) | 0.48 (0.41 - 0.55) | 0.54 (0.47 - 0.62) |
| 3                                    | 0.17 (0.12 - 0.21) | 0.32 (0.26 - 0.38) | 0.40 (0.34 - 0.47) | 0.43 (0.36 - 0.50) | 0.43 (0.36 - 0.50) | 0.50 (0.43 - 0.58) |
| 4                                    | 0.25 (0.18 - 0.31) | 0.34 (0.27 - 0.42) | 0.38 (0.30 - 0.46) | 0.42 (0.34 - 0.51) | 0.43 (0.35 - 0.52) | 0.49 (0.40 - 0.58) |
| 5                                    | 0.17 (0.10 - 0.25) | 0.31 (0.21 - 0.41) | 0.36 (0.25 - 0.47) | 0.41 (0.29 - 0.53) | 0.42 (0.30 - 0.54) | 0.48 (0.35 - 0.60) |
